# Supplementary material for: Evaluation of EGFR and COX pathway inhibition in human colon organoids of serrated polyposis and other hereditary cancer syndromes
Source: PubMed Central journal article supplement (PMC11512843; doi:10.1007/s10689-024-00370-7), 2024-04-12

# Supplemental Figure 2

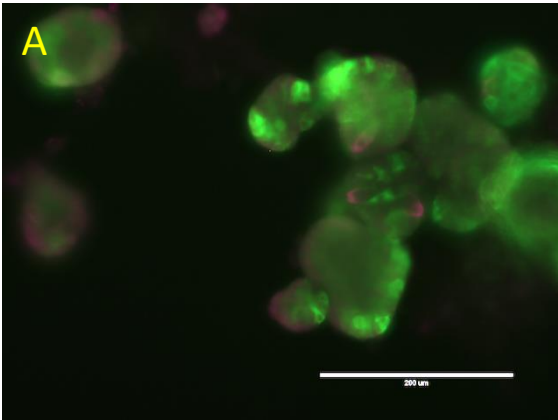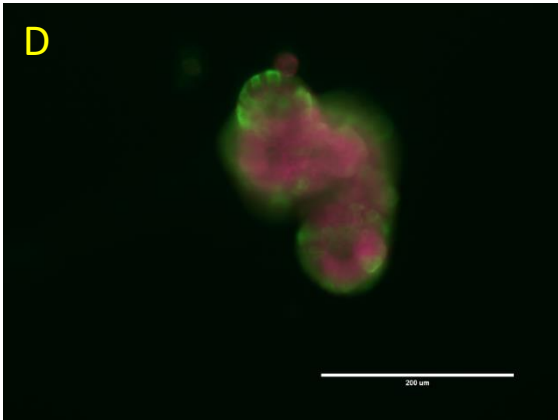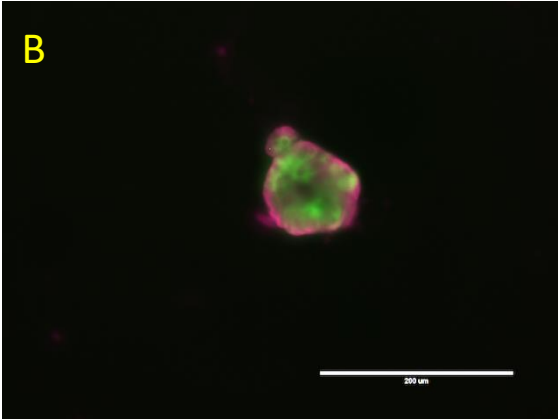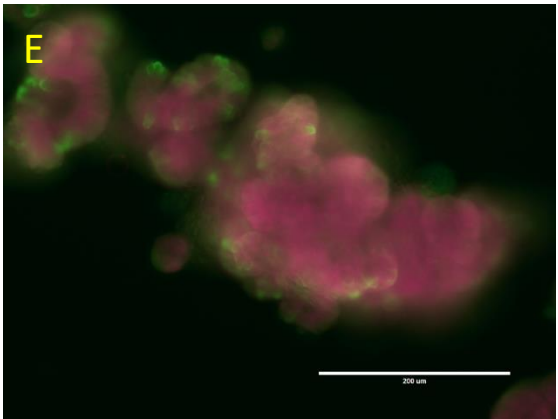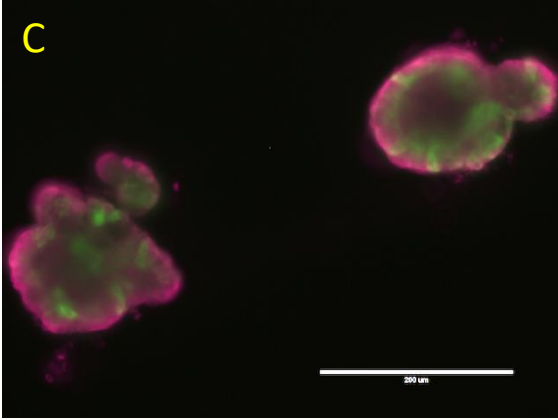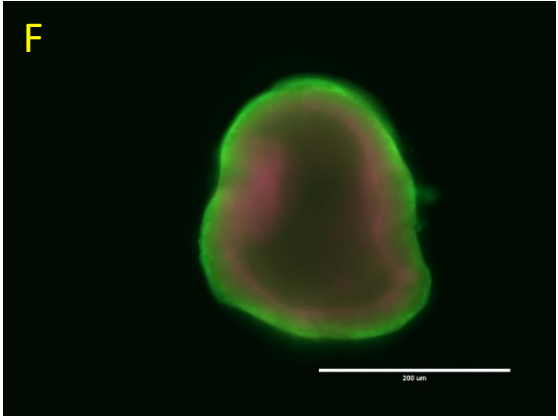

Supplement: 10689_2024_370_MOESM2_ESM.pdf [file 10689_2024_370_MOESM2_ESM.pdf]
